# Supplementary material for: Large Deletions, Cleavage of the Telomeric Repeat Sequence, and Reverse Transcriptase-Mediated DNA Damage Response Associated with Long Interspersed Element-1 ORF2p Enzymatic Activities
Source: MDPI journal article supplement (doi:10.3390/genes15020143), 2024-01-23
Supplement: s1 [file s1]

**Supplemental Materials:** The following supportive information can be found Figures S1–7.

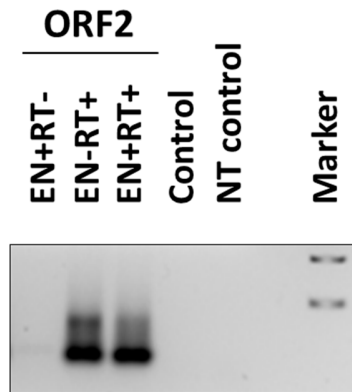

**Figure S1. ORF2 proteins containing inactive endonuclease retain the ability to synthesize cDNA in HEK 293 cells.** ORF2 expression plasmids designed to express either a wild type (EN+RT+) or mutant (EN+RT- or EN-RT+) proteins were transiently transfected into HEK 293 cells. The polyribosomal fraction was purified 24 hours after transfection and used for assessing their ability to perform RT-dependent cDNA synthesis as previously described. The resulting DNA products were fractionated on an agarose gel. Control are cellular lysates from cells transfected with an empty plasmid. NT control is a no template control during PCR amplification of the cDNA products. Marker indicates a DNA ladder.

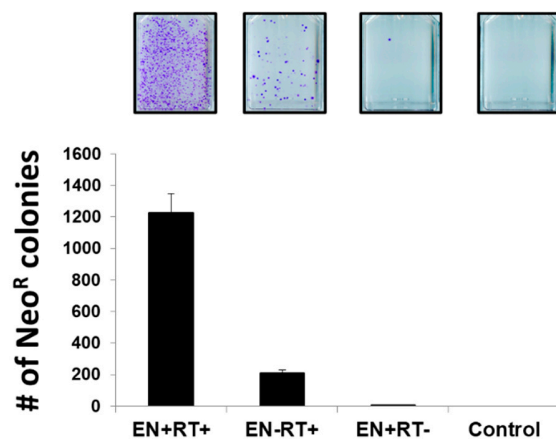

**Figure S2. EN-RT+ ORF2p supports low levels of Alu retrotransposition in HeLa cells.** Constructs containing EN+RT+, EN+RT-, or EN-RT+ ORF2 sequences and AluNeo expression construct were transiently cotransfected into HeLa cells. G418 selection for 14 days resulted in Neo-resistant colonies formed by cells harboring *de novo* Alu integration events. Alu retrotransposition supported by EN-RT+ was significantly lower than the control (EN+RT+) (N=3, student's t-test,  $p < 0.05$ ).

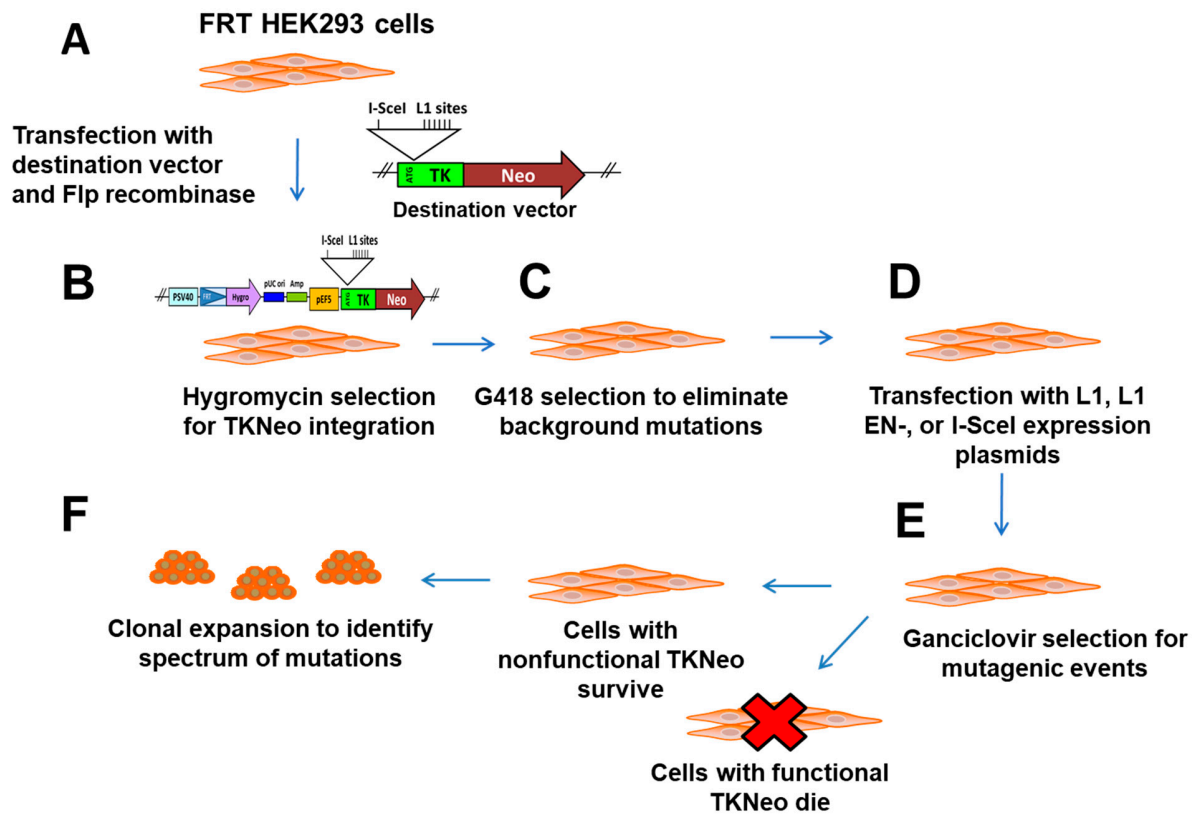

**Figure S3. Schematic of the experimental approach to generate HEK 293 cells harboring a single copy of the TK/Neo reporter cassette.** **A.** Existing FRT HEK 293 cells harboring a single copy of the FRT cite are transiently co-transfected with a destination plasmid containing TK/Neo sequence and Flp recombinase expression plasmid. **B.** Flp-mediated recombination results in hygromycin resistance (HygR). **C.** HygR cells are next selected with G418 to eliminate cells that may have accumulated random mutations in the reporter cassette. **D.** Transient transfection of NeoR cells with plasmids of interest followed by Gan selection to capture cells containing mutagenic TK events (**E**). **F.** Resulting GanR colonies can be used for analysis of mutagenic events.

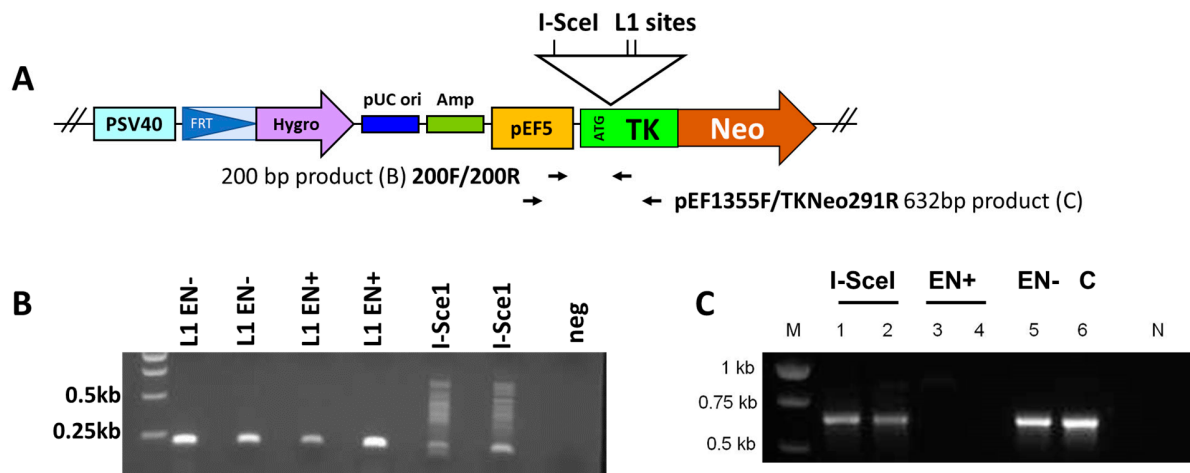

**Figure S4. Analysis of mutations induced by transient L1 expression.** **A.** Schematic of the integrated TK/Neo reporter cassette. Black horizontal arrows indicate approximate position of PCR primers and product size. **B.** Site-specific PCR analysis of DNA extracted from pulled GanR colonies resulting from exposure to L1 EN- (mutant EN), L1 EN+ (functional EN), or I-Sce1 (N=2). Neg is negative control is original FRT HEK 293 cells that do not contain the TK/Neo cassette. **C.** Site-specific PCR analysis of individual GanR colonies resulting from exposure of FRT HEK 293 or NIH-3T3 cells to I-Sce1 (1 and 2), L1 EN+ (3 and 4), or L1 EN- (6). C is a positive control for the TK/Neo cassette detection in the HEK 293 cells DNA before Gan selection. N is no template control.

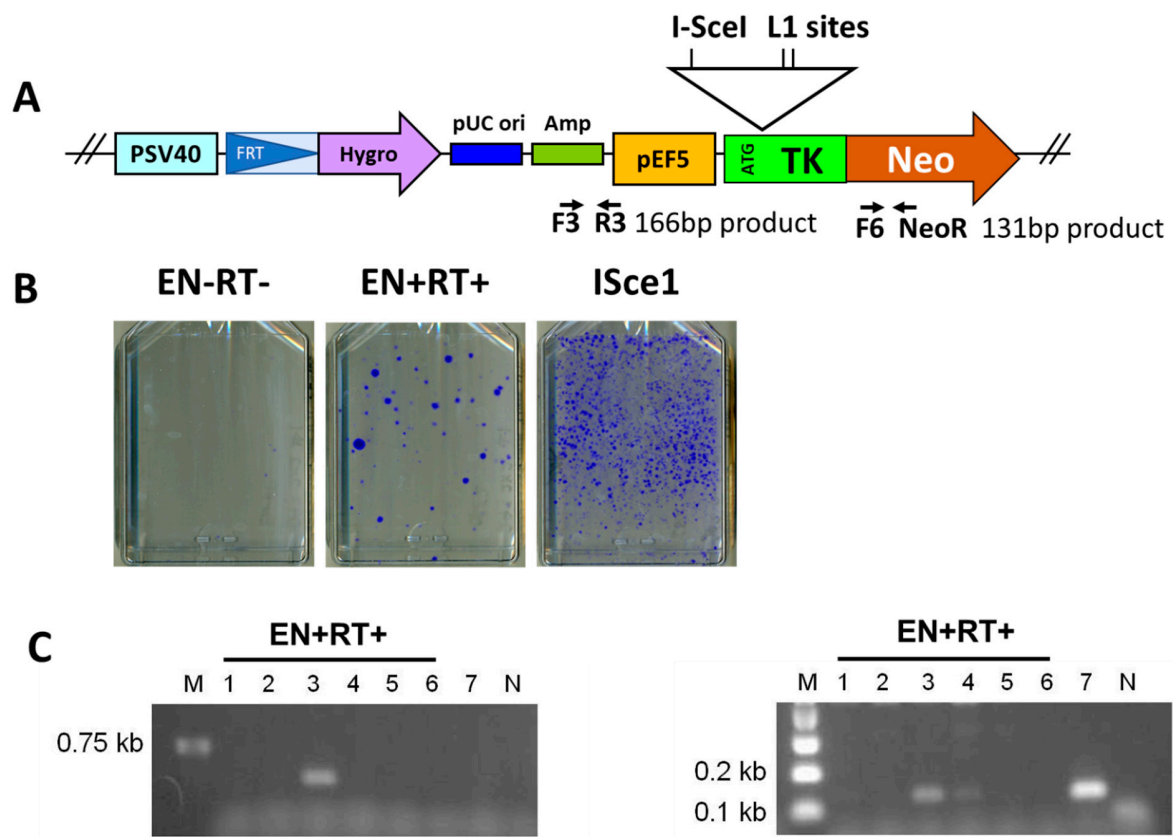

**Figure S5. ORF2p expression causes large deletions.** **A.** Schematic of the TK/Neo cassette integrated in the FRT site of HEK 293 cells. Black horizontal arrows indicate approximate positions of PCR primers. **B.** GanR colonies resulting from TK/Neo HEK 293 transfection with plasmids expressing EN-RT-, EN+RT+ ORF2p, or I-SceI. **C.** Site-specific PCR analysis of DNA extracted from 6 GanR colonies (Lanes 1-6) using primer pairs complementary to sequences 5' (left) and 3' (right) of the L1 sites. N is no template control. Lane 7 genomic DNA from FRT HEK 293 cells without TK/Neo. The F3/R3 and F6/NeoR primer sets are not expected to generate PCR products when DNA extracted from the FRT HEK 293 cells is used as a template. The band in Lane 7 (right panel) is nonspecific.

**File S1. Annotated sequence of the TK/Neo reporter cassette.**

pEF5 Promoter (pEF5F primer, pEF1355F primer, 200F primer)

CGTGAGGCTCCGGTGCCCGTCAGTGGGCAGAGCGCACATCGCCACAGTCCCCGAGAA GTTGGGGGGAGGGGT  
CGGCAATTGAACCGGTGCCTAGAGAAGGTGGCGCGGGGTAACTGGGAAAGTGATGTCGTGTA CTGGCTCCGC  
CTTTTTCCCGAGGGTGGGGGAGAACCGTATATAAGTGCAGTAGTCGCCGTGAACGTTCTTTTTCGCAACGGGTTT  
GCCGCCAGAACACAGGTAAGTGCCGTGTGTGGTTCCCGCGGGCCTGGCCTCTTTACGGGTTATGGCCCTGCGT  
GCCTTGAATTACTTCCACCTGGCTGCAGTACGTGATTCTTGATCCCGAGCTTCGGGTTGGAAGTGGGTGGGAGA  
GTTTCGAGGCCTTGCGCTTAAGGAGCCCTTCGCTCGTGCTTGAGTTGAGGCCTGGCCTGGGCGCTGGGGCCGC  
CGCGTGCGAATCTGGTGGCACCTTCGCGCCTGTCTCGCTGCTTCGATAAGTCTCTAGCCATTTAAATTTTTGAT  
GACCTGCTGCGACGCTTTTTTCTGGCAAGATAGTCTTGTAATGCGGGCCAAGATCTGCACACTGGTATTTCCG  
TTTTTGGGGCCGCGGGCGGCGACGGGGCCCGTGCCTCCAGCGCACATGTTTCGGCGAGGCGGGGCTGCGAGC  
GCGGCCACCGAGAATCGGACGGGGGTAGTCTCAAGCTGGCCGGCCTGCTCTGGTGCCTGGCCTCGCGCCGCCGT  
GTATCGCCCCGCCCTGGGCGGCAAGGCTGGCCCGGTGGCCACAGTTGCGTGAGCGGAAAGATGGCCGCTTCCC  
GGCCCTGCTGCAGGGAGCTCAAATGGAGGACGCGGCGCTCGGGAGAGCGGGCGGGTGAGTACCCACACAA  
AGGAAAAGGGCCTTCCGTCCTCAGCCGTCGTTTATGTGACTCCACGGAGTACCGGGCGCCGTCCAGGCACCTC  
GATTAGTTCTCGAGCTTTTGGAGTACGTCTTTAGGTTGGGGGAGGGGTTTATGCGATGGAGTTTCCCCAC  
ACTGAGTGGGTGGAGACTGAAGTTAGGCCAGCTTGGCACTTGATGTAATTCTCCTTGGAAATTTGCCCTTTTGA  
TTTGATCTTGTTTCTTCAAGCCTCAGACAGTGGTTCAAAGTTTTTTTCTTCCATTTAGGTGTCGTGA  
GGAATTAGCTTGGTACTAATACGACTCACTATAGGGAGACCAAGCTGGCTAGGTAAGCTTGGTACCGAGCTCGG  
ATCCACTAGTCCAGTGTGGTGAATTCTGCAGATATCAACAAGTTTGTACAAAAAAGCAGGcaccggaAGATCTtgc  
cgccacc

HSV TK (I-SceI site, L1 sites, 200R primer, TK/Neo295R primer,)

ATGGCTGCTAGCctatattaccctgttaTCcctagcgttaactGCTAGCatttttaagaattttattttaaaatttttaataat  
TCGTACCCC TGCCATCAACATGCGTCTGCGTTGACACAGGCTGCGCGTTCTCGCGGCCATAACAACCGACGTACGG  
CGTTGCGCCCTCGCCGGCAACAAAAGCCACGGAAGTCCGCTGGAGCAGAAAATGCCACGCTACTGCGGGTTT  
ATATAGACGGTCCCCACGGGATGGG GAAAACCACCACCACGCAACTGCTGGTGGCCCTGGGTTGCGCGACGAT  
ATCGTCTACGTACCCGAGCCGATGACTTACTGGCGGGTGTGGGGGCTTCCGAGACAATCGGAACATCTACACC  
ACACAACACCGCCTCGACCAGGGTGAGATATCGGCCGGGGACGCGCGGTGTAATGACAAGCGCCAGATAAC  
AATGGGCATGCCTTATGCCGTGACCGACGCCGTTCTGGCTCCTCATATCGGGGGGAGGCTGGGAGCTCACATGC  
CCCCCCCCGGCCCTCACCTCATCTTCGACCGCCATCCCATCGCCGCCCTCCTGTGCTACCCGGCCGCGGATACC  
TTATGGGCAGCATGACCCCCAGGCCGTGCTGGCGTTCTGGCCCTCATCCCGCCGACCTTGCCCGGCACAAACAT  
CGTGTGGGGGCCCTTCCGGAGGACAGACATCGACCGCCTGGCCAAACGCCAGCGCCCCGGCGAGCGGCTTG  
ACCTGGCTATGCTGGCCGCGATTGCGCGCTTATGGGCTGCTTGCCAATACGGTGCGGTATCTGCAGGGCGGCG  
GGTCTGTGGCGGGAGGATTGGGGACAGCTTTCGGGGGCGGCCGTGCCGCCAGGGTGCCGAGCCCCAGAGCAA  
CGCGGGCCACGACCCCATATCGGGGACACGTTATTTACCTGTTTCGGGGCCCCGAGTTGCTGGCCCCAACGGC  
GACCTGTATAACGTGTTTGCCTGGGCTTTGGACGTCTTGCCAAACGCCTCCGTCCCATGCATGTCTTTATCCTGGA  
TTACGACCAATCGCCCGCGGTGCCGGGACGCCCTGCTGCAACTTACCTCCGGGATGGTCCAGACCCACGTCAAC  
ACCCAGGCTCCATACCGACGATCTGCGACCTGGCGCGCACGTTTGCCCGGAGATGGGGGAGGCTAAC

Neo (F6 primer, NeoR primer)

ATTGAACAAGATGGATTGCACGCAGGTTCTCCGGCCGCTTGGGTGGAGAGGCTATTGCGCTATGACTGGGCACA  
ACAGACAATCGGCTGCTCTGATGCCGCCGTGTTCCGGCTGTACGCGCAGGGGCGCCCGGTTCTTTTGTCAAGAC  
CGACCTGTCCGGTGCCCTGAATGAAGTGCAGGACGAGGCAAGCGCGGCTATCGTGGCTGGCCACGACGGGCGTTC  
CTTGCGCAGCTGTGCTCGACGTTGTACTGAAGCGGGAAGGGACTGGCTGCTATTGGGCGAAGTGCCGGGCGAG  
GATCTCCTGTATCTACCTTGCTCCTGCCGAGAAAGTATCCATCATGGCTGATGCAATGCGGCGGCTGCATACGC  
TTGATCCGGCTACCTGCCCATTGACACCAAGCGAAACATCGCATCGAGCGAGCACGTA CTGGATGGAAGCCG  
GTCTTGTGATCAGGATGATCTGGACGAAGAGCATCAGGGGCTCGCGCCAGCCGAAGTTGCGCCAGGCTCAAGG  
CGCGCATGCCCGACGGCGAGGATCTCGTCTGTGACCCATGGCGATGCCTGCTTGCCGAATATCATGGTGAAAATG

GCCGCTTTTCTGGATTCATCGACTGTGGCCGGCTGGGTGTGGCGGACCGCTATCAGGACATAGCGTTGGCTACCC  
GTGATATTGCTGAAGAGCTTGGCGGCGAATGGGCTGACCGCTTCCTCGTGCTTTACGGTATCGCCGCTCCCGATT  
GCAGCGCATCGCCTTCTATCGCCTTCTTGACGAGTTCTTCTGA  
CGGAGTACTGTCCTCCGAGCGGAGTACTGTCCTCCGACTCGAGCGGAGTACTGTCCTCCGATCGGAGTACTGTCCT  
CCGCGAATTCCGGAGTACTGTCCTCCatgcatACCCAGCTTTCTTGACAAAGTGGTTGATATCCAGCACAGTGGCGG  
CCGCTCGAGTCTAGAGGGCCCGCGGTTTCGAAGGTAAGCCTATCCCTAACCCCTCTCCTCGGTCTCGATTCTACGCGT  
ACCGGTTAGTAATGAGTTTAAACCCGCTGATCAGCCTCGA

**BGH polyadenylation signal**

CTGTGCCTTCTAGTTGCCAGCCATCTGTTGTTTGCCCCTCCCCGTGCCTTCCTTGACCCTGGAAGGTGCCACTCCCA  
CTGTCCTTTCCTAATAAAATGAGGAAATTGCATCGCATTGTCTGAGTAGGTGTCATTCTATTCTGGGGGGTGGGGT  
GGGGCAGGACAGCAAGGGGGAGGATTGGGAAGACAATAGCAGGCATGCTGGGGATGCGGTGGGCTCTATGG
